# Supplementary material for: Antirhea borbonica Aqueous Extract Protects Albumin and Erythrocytes from Glycoxidative Damages
Source: PubMed Central journal article supplement (PMC7278591; doi:10.3390/antiox9050415), 2020-05-12
Supplement: antioxidants-09-00415-s001.pdf [file antioxidants-09-00415-s001.pdf]

## Supplementary materials

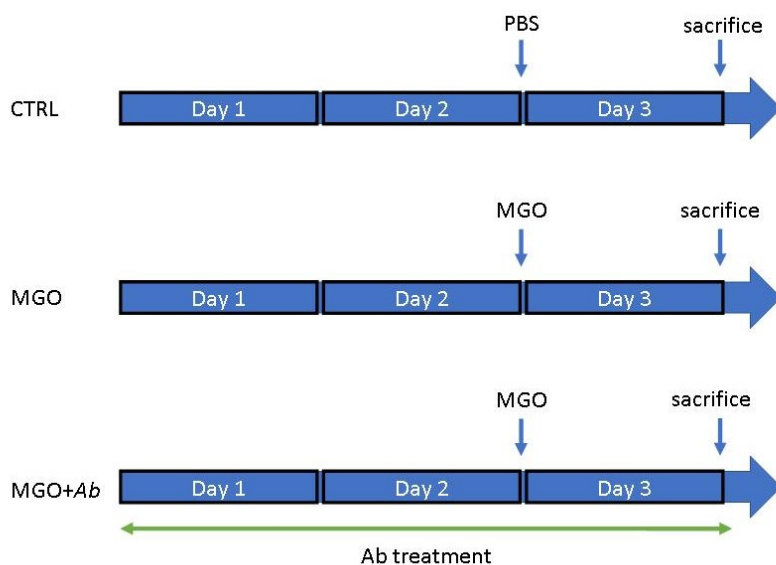

**Figure S1: Experimental protocol for zebrafish experiments.** Zebrafishes were divided into three groups: (CTRL) control fish treated with PBS, (MGO) fish treated with MGO (100 mg/kg of body weight) and (MGO+Ab) fish treated with MGO (100 mg/kg of body weight) and one more day Ab.

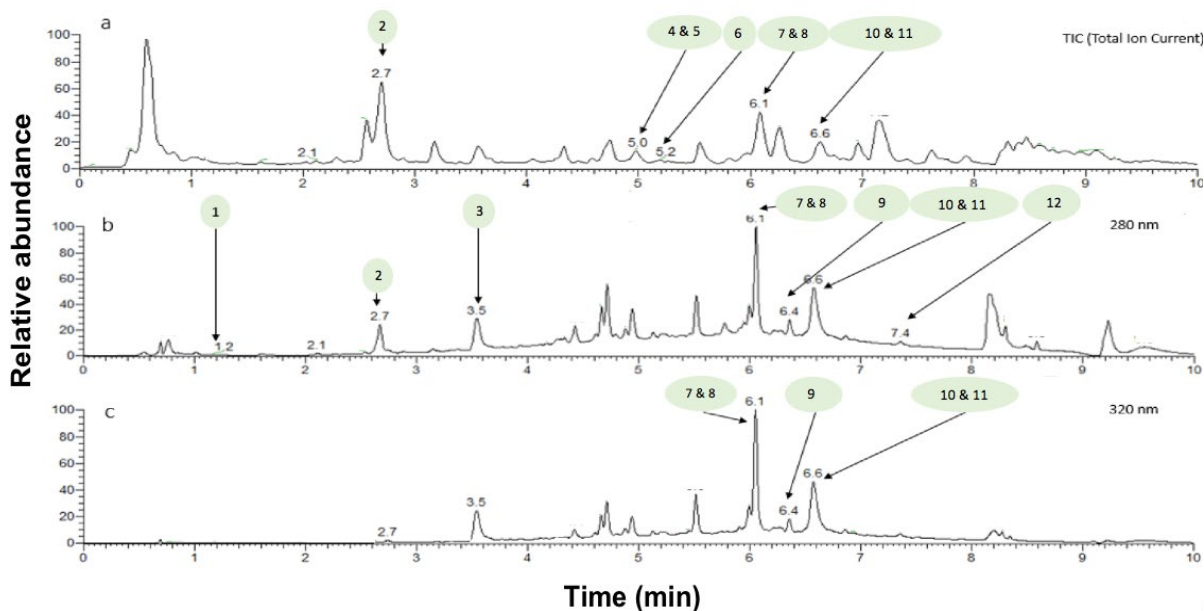

**Figure S2: Identification of polyphenols from *A. borbonica* plant extract.** Polyphenol-rich plant extracts were analysed by using a Q Exactive Plus mass spectrometer. Compounds were identified according to their retention time (min)/molecular weight (Da).

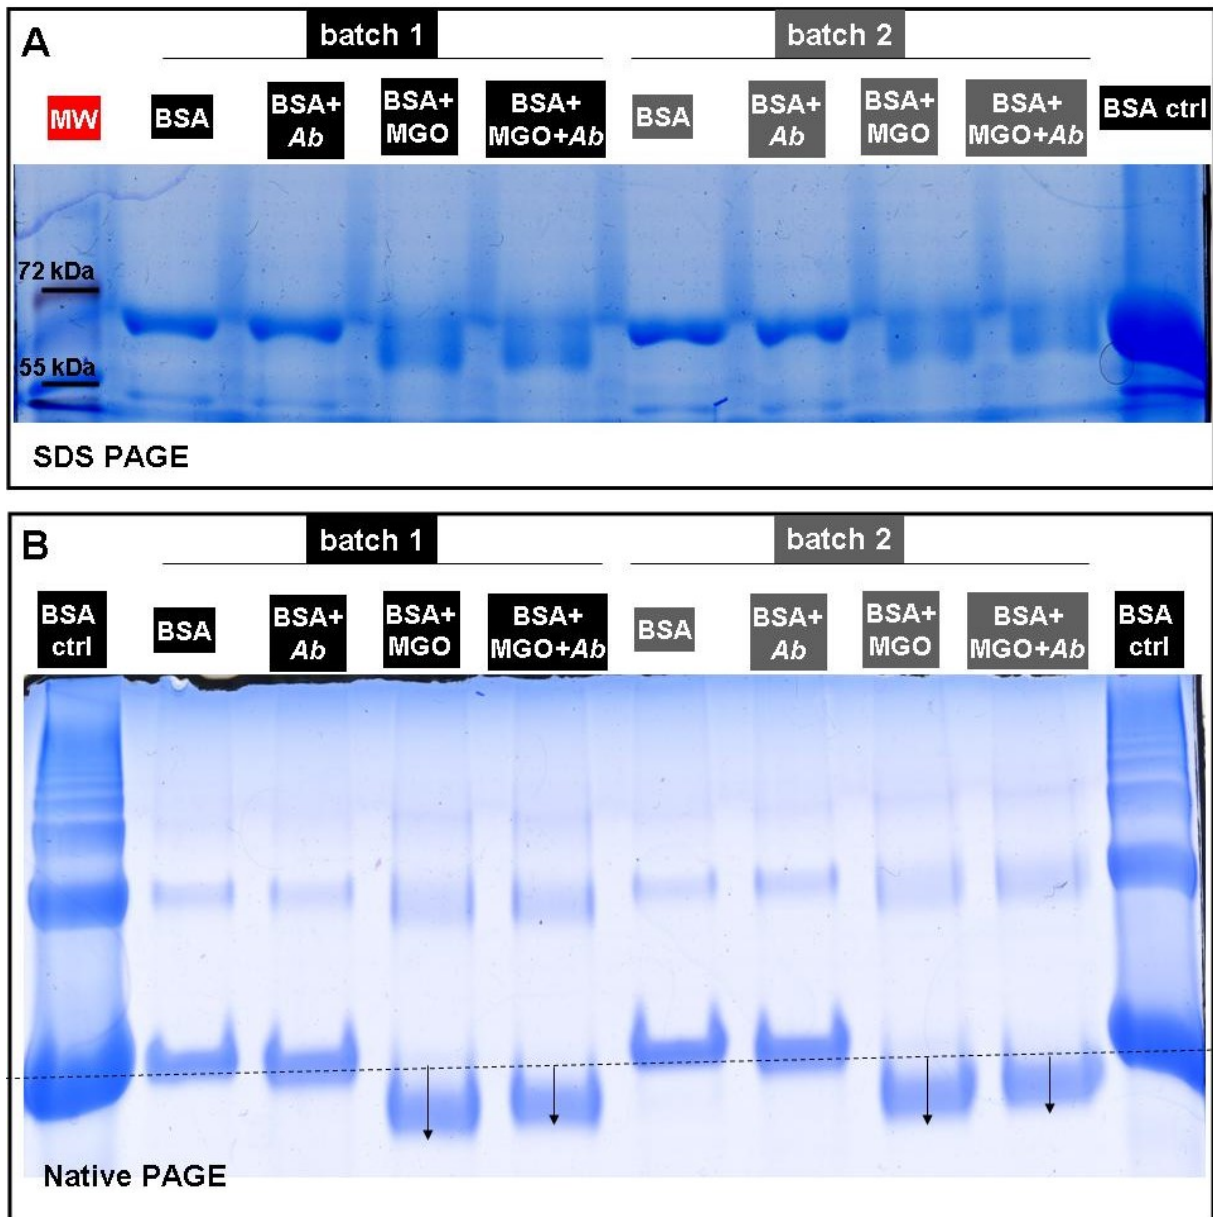

**Figure S3: Methylglyoxal and *A. borbonica* plant extract induced change in electrophoretic pattern of albumin.** A) Coomassie blue staining of albumin samples (5  $\mu$ g, for two different batches) separated by sodium dodecyl sulphate (SDS)-polyacrylamide gel electrophoresis (PAGE) (12.5%); B) electrophoretic migration profile of native polyacrylamide gel electrophoresis (12.5%); BSA ctrl (60  $\mu$ g) correspond to native albumin (without any incubation at 37°C).

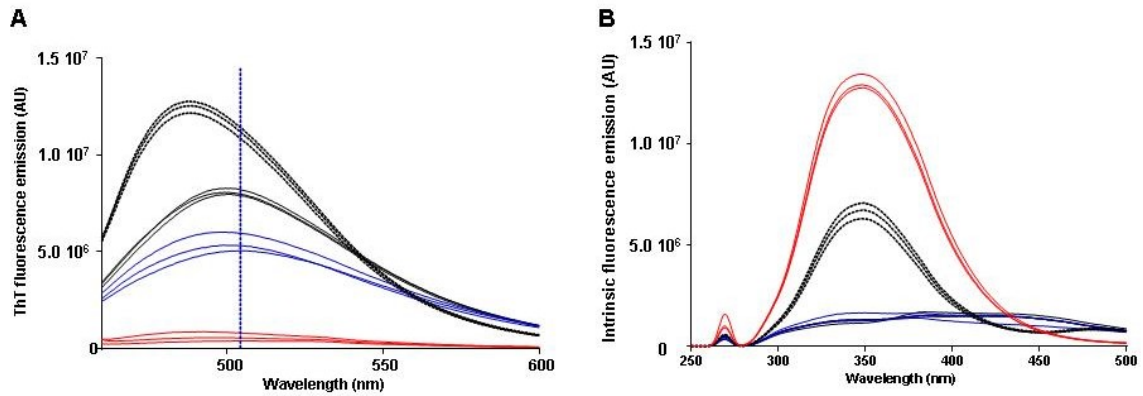

**Figure S4: Methylglyoxal and *A. borbonica* plant extract induced albumin conformational changes.** A) Normalized fluorescence spectra of Thioflavin T (ThT) at 435 nm wavelength excitation; B) Normalized intrinsic fluorescence spectra (tryptophan and tyrosine) at 270 nm excitation wavelength for BSA (red line), BSA+*Ab* (black dotted line), AGE (blue line) and AGE+*Ab* (black plain line).

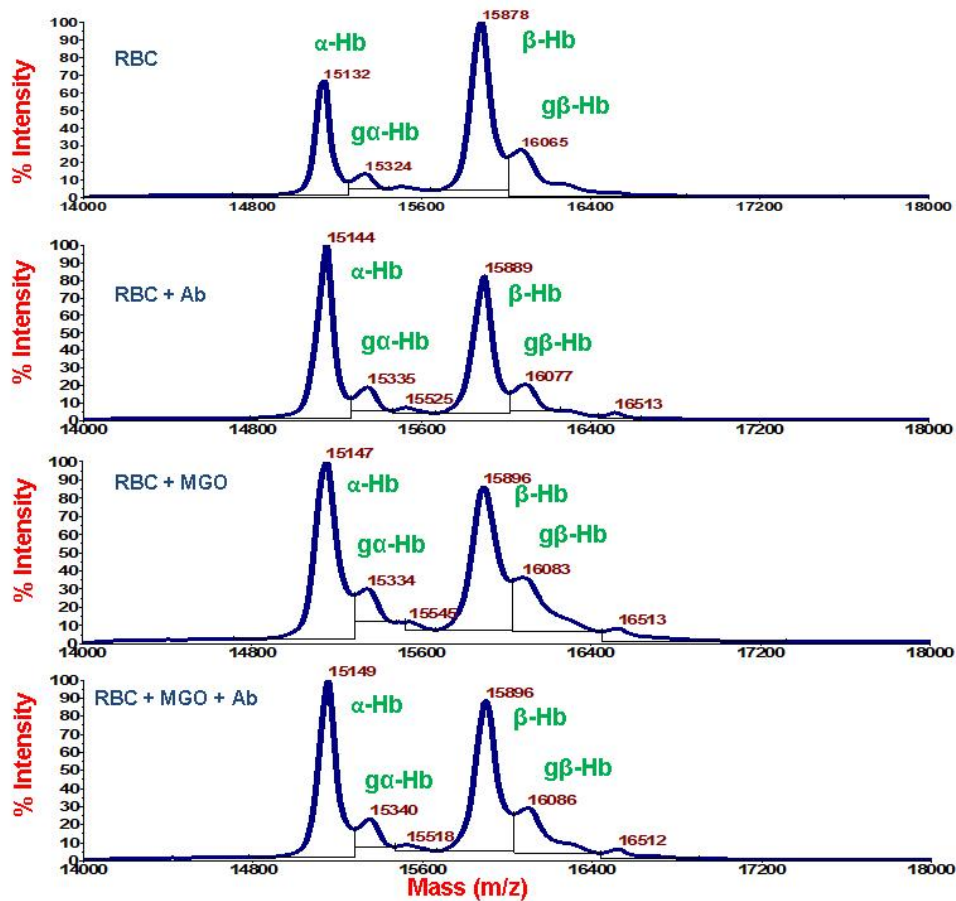

**Figure S5: Characterisation of glycation percentage in the different erythrocyte preparations by mass spectrometry.**

Representative figures of the mass spectra obtained in three independent experiments for each incubation condition: RBC, RBC+Ab, RBC+MGO and RBC+MGO+Ab. On each spectrum, four main peaks were obtained corresponding to  $\alpha$ -hemoglobin ( $\alpha$ -Hb; 15140 Da), glycated  $\alpha$ -hemoglobin ( $g\alpha$ -Hb; 15333 Da),  $\beta$ -hemoglobin ( $\beta$ -Hb; 15890 Da), glycated  $\beta$ -hemoglobin ( $g\beta$ -Hb; 16080 Da).

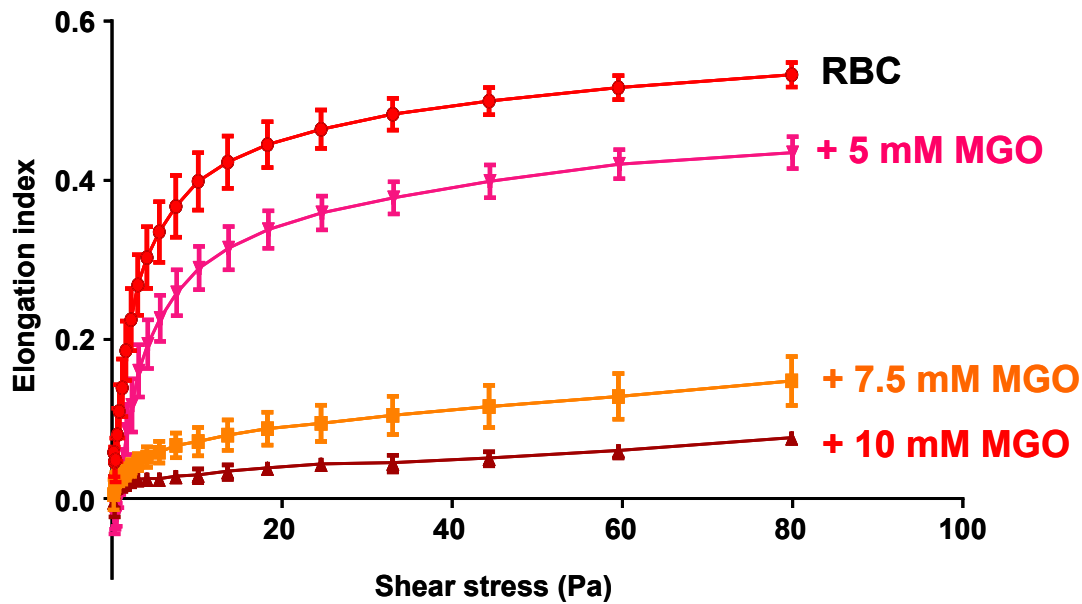

**Figure S6: Methyl glyoxal impairs erythrocyte capacity to be deformed.** Curves represent erythrocyte deformation as elongation index as a function of shear stress for RBC (red line); RBC+5 mM MGO (pink line); RBC+ 7.5 mM MGO (orange line) and RBC+ 10 mM MGO (brown line) erythrocytes samples. Data are mean  $\pm$  SEM of four independent experiments.

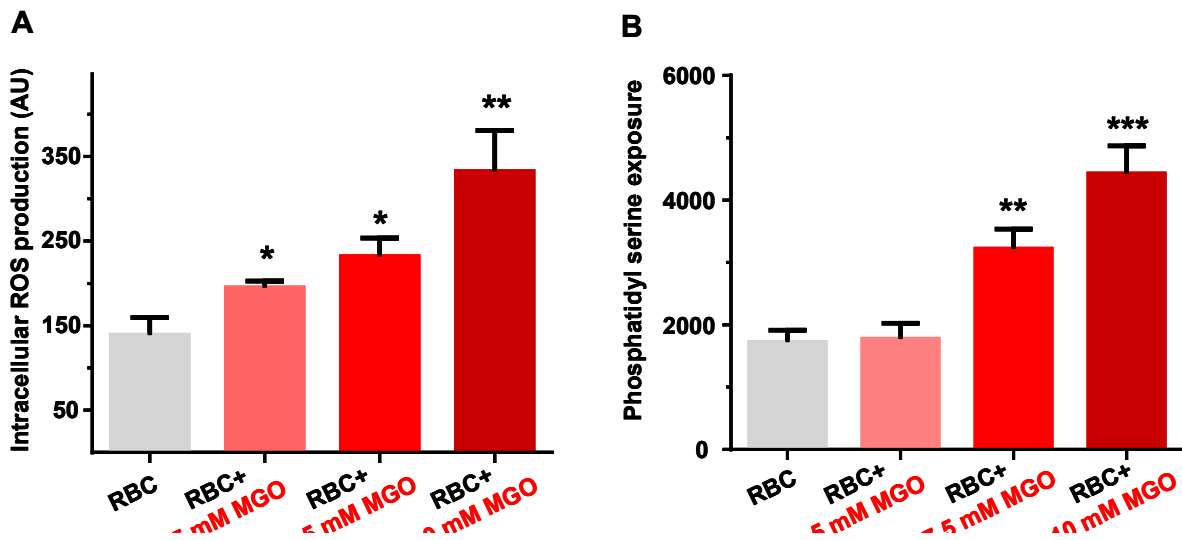

**Figure S7: Methyl glyoxal induced dose-dependent increase in intracellular ROS production and erythrocyte eryptosis.** A) Intracellular ROS levels were measured by flow cytometry using HDCF-DA fluorescent probe and B) phosphatidylserine exposure (PS) was determined with annexin V-FITC fluorescent probes. Data are mean  $\pm$  SEM of four independent experiments. \*Effect of MGO (vs. RBC), \*\*\* $p < 0.001$ , \*\* $p < 0.01$ , \* $p < 0.05$ .

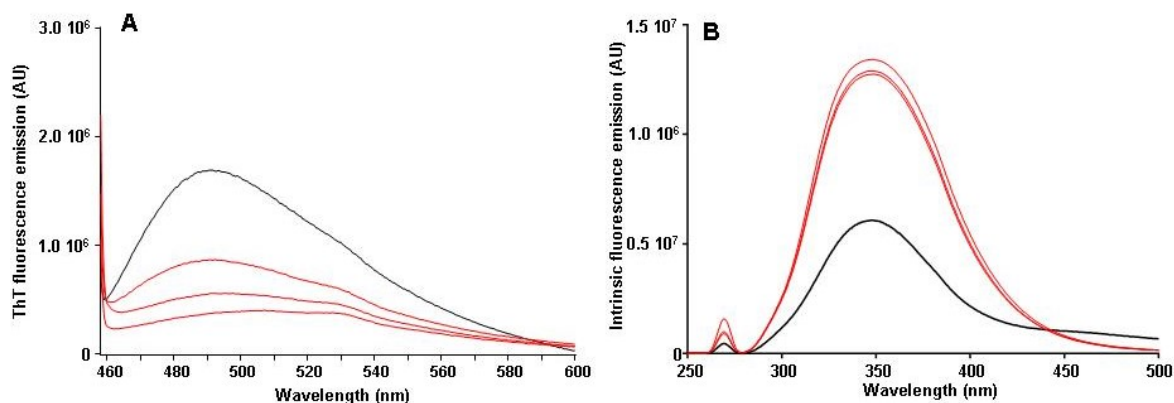

**Figure S8: Caffeic acid induced albumin conformational changes and  $\beta$ -aggregation.** **A)** Normalized fluorescence spectra of Thioflavin T (ThT) at 435 nm wavelength excitation and specific probe for  $\beta$ -aggregates; **B)** Normalized intrinsic fluorescence spectra at 270 nm excitation wavelength for BSA (red line) (performed in triplicate), BSA+Caffeic acid (black line). BSA (20 g/L in PBS) was incubated during 7 days in the absence or presence of caffeic acid (360  $\mu$ M final concentration).
